# Supplementary material for: Optimizing the dielectric constant of the shell layer in core–shell structures for enhanced energy density of polymer nanocomposites
Source: Royal Society of Chemistry journal article supplement (doi:10.1039/d3cp01367g), 2023-01-01
Supplement: d3cp01367g1.pdf [file d3cp01367g1.pdf]

## Supplementary Material

### **Optimizing dielectric constant of shell layer in core-shell structures for enhanced energy density of polymer nanocomposites**

Quan-Ping Zhang, Fang-Yan Du, Xiu Liu, Jia-Hao Lv, Li He, Jia-Le Li, Yin-Tao Li, Yuan-Lin Zhou

*State Key Laboratory of Environment-friendly Energy Materials, School of Materials Science and Engineering, Southwest University of Science and Technology, Mianyang 621010, China*

**Corresponding authors:** Quan-Ping Zhang

**E-mails:** zhangqp@swust.edu.cn

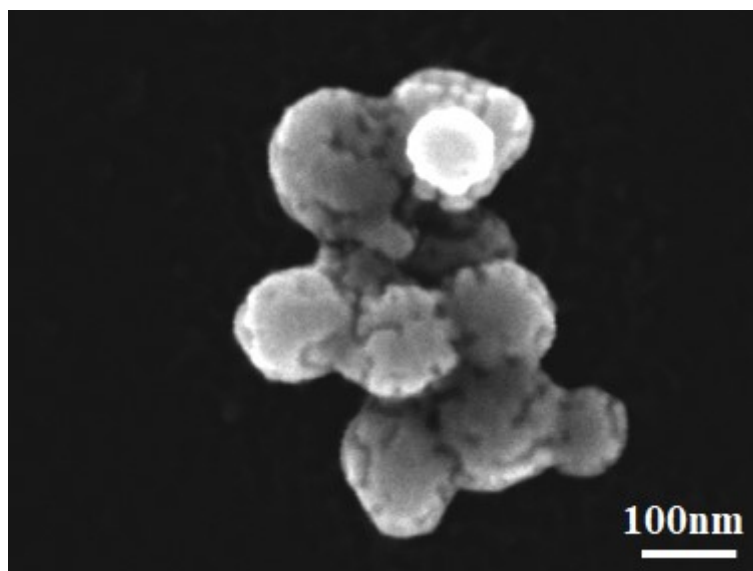

**Figure S1** SEM image of neat BT nanoparticles

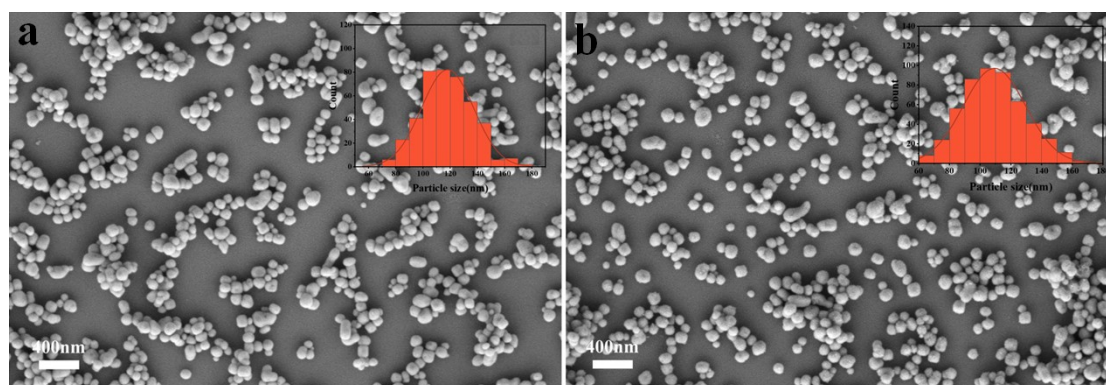

**Figure S2.** SEM images and size distribution of BaTiO<sub>3</sub> nanoparticles before (a) and after modification (b) with PF30.

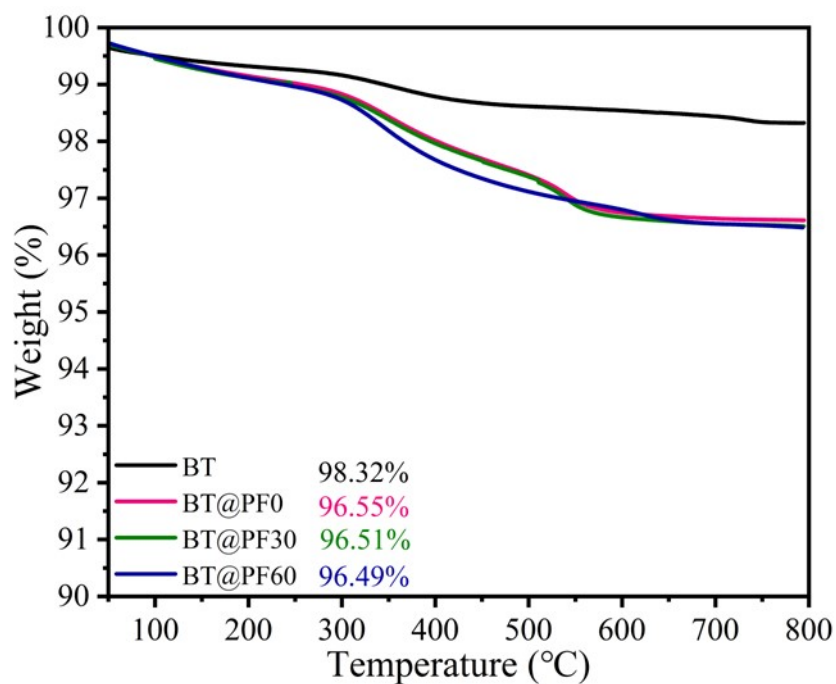

Figure S3 TGA curves of BT nanoparticles with and without the treatments of various fluoropolymers

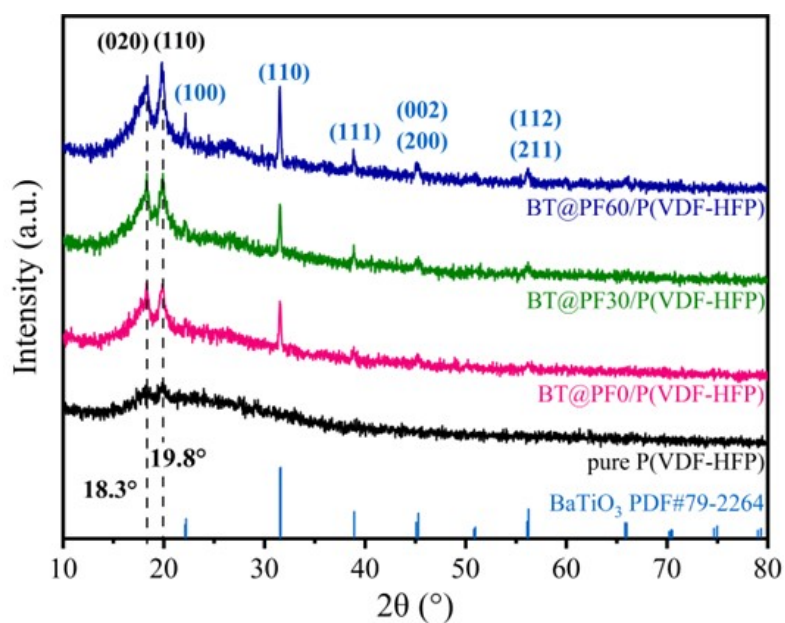

Figure S4 XRD patterns of P(VDF-HFP) with and without adding BT@PF nanoparticles

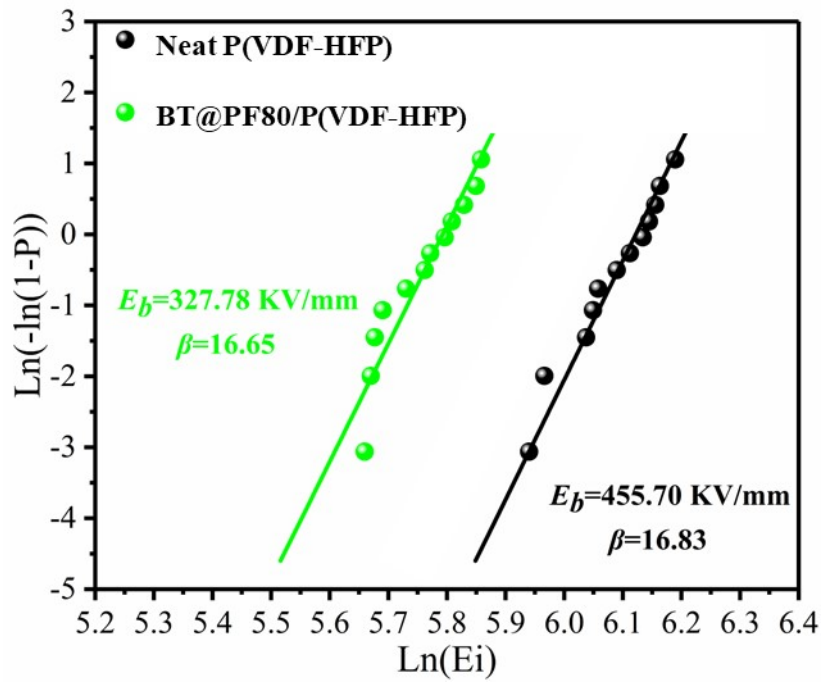

Figure S5 Breakdown strength of BT@PF80/P(VDF-HFP) and neat P(VDF-HFP)
